# Supplementary material
Source: PubMed Central journal article supplement (PMC4437530)

Number of Manometry Studies

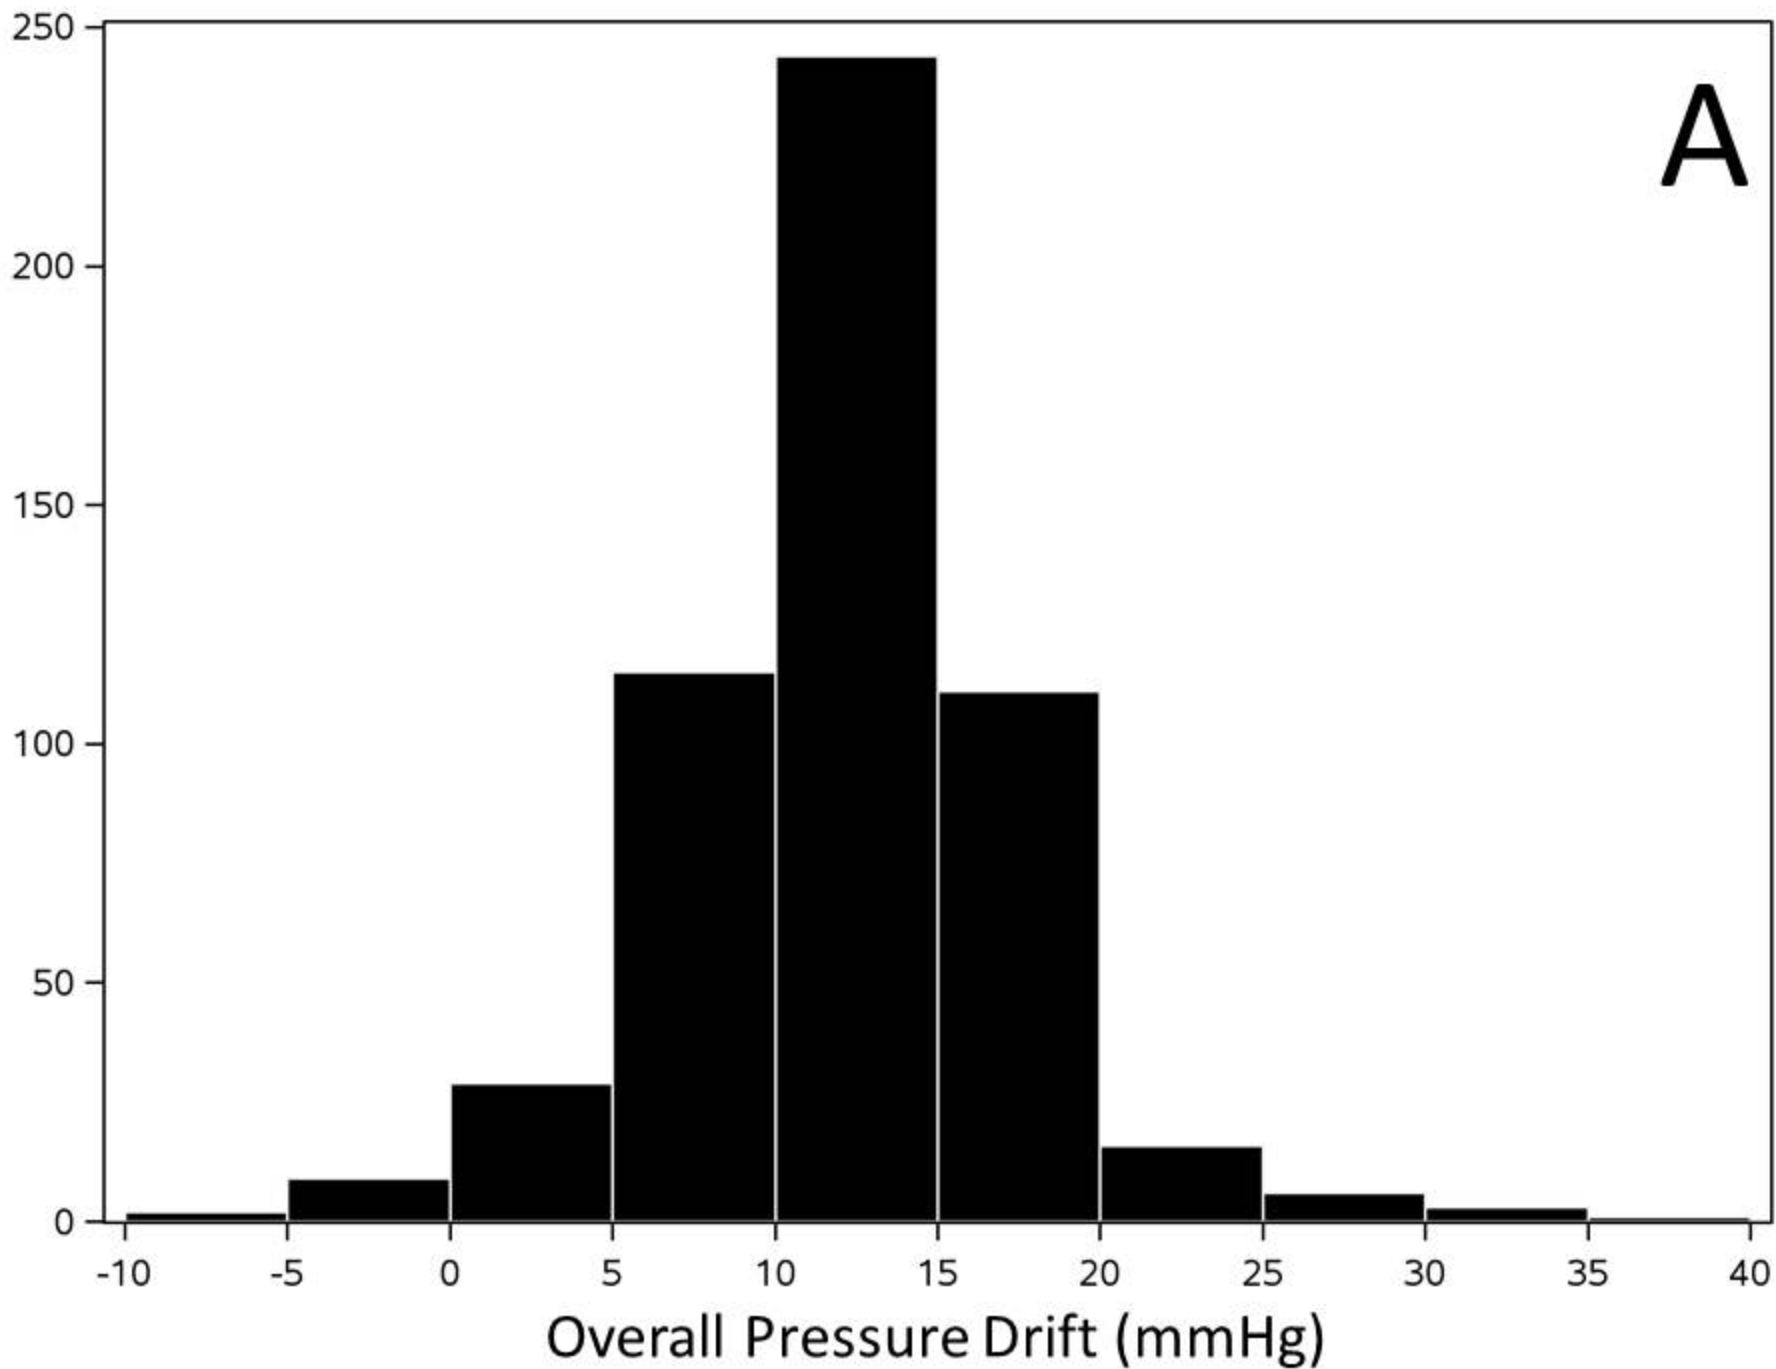

A

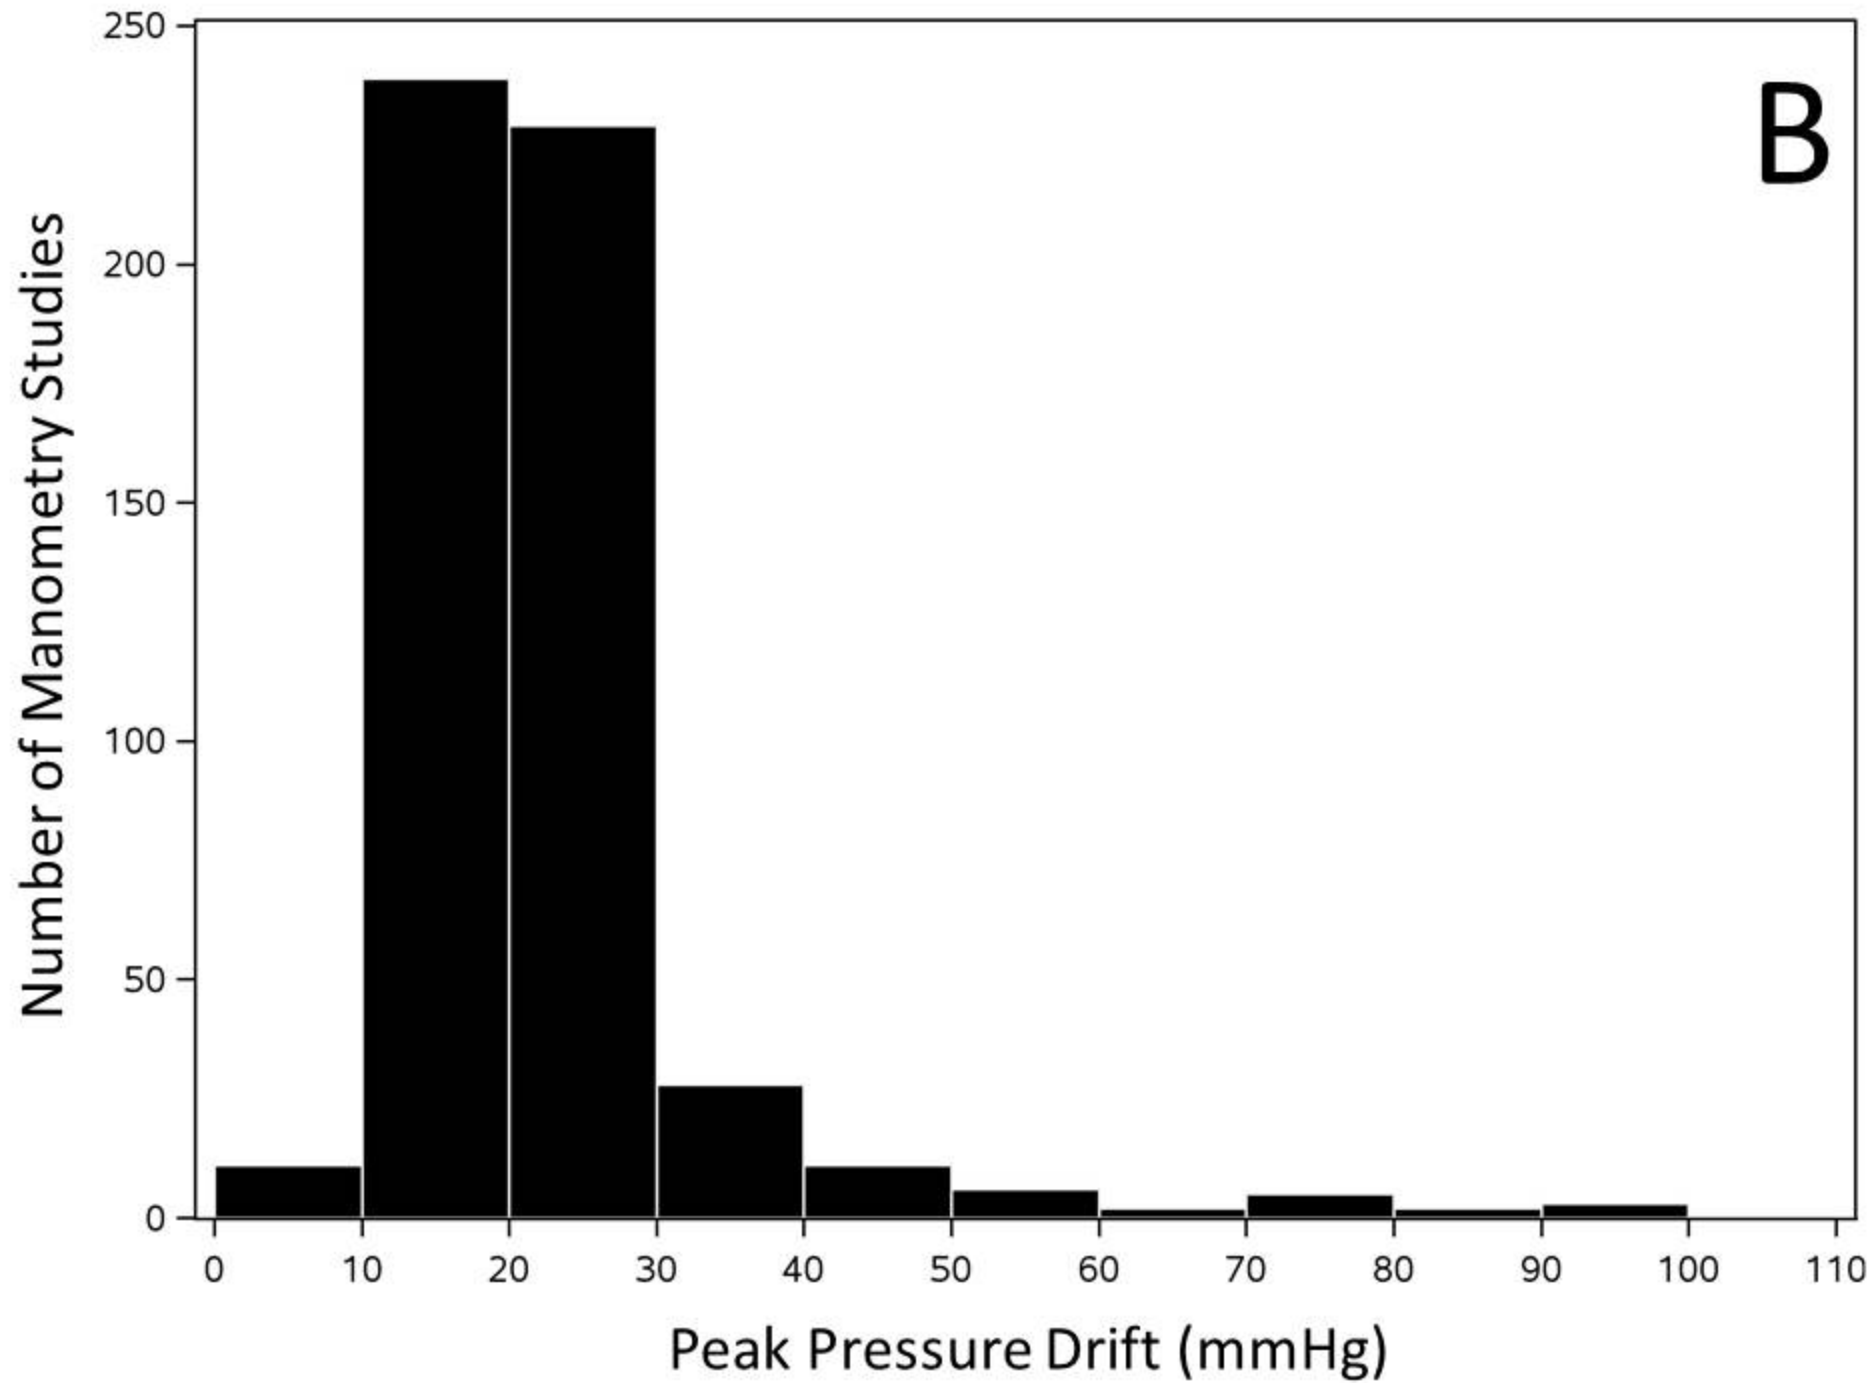

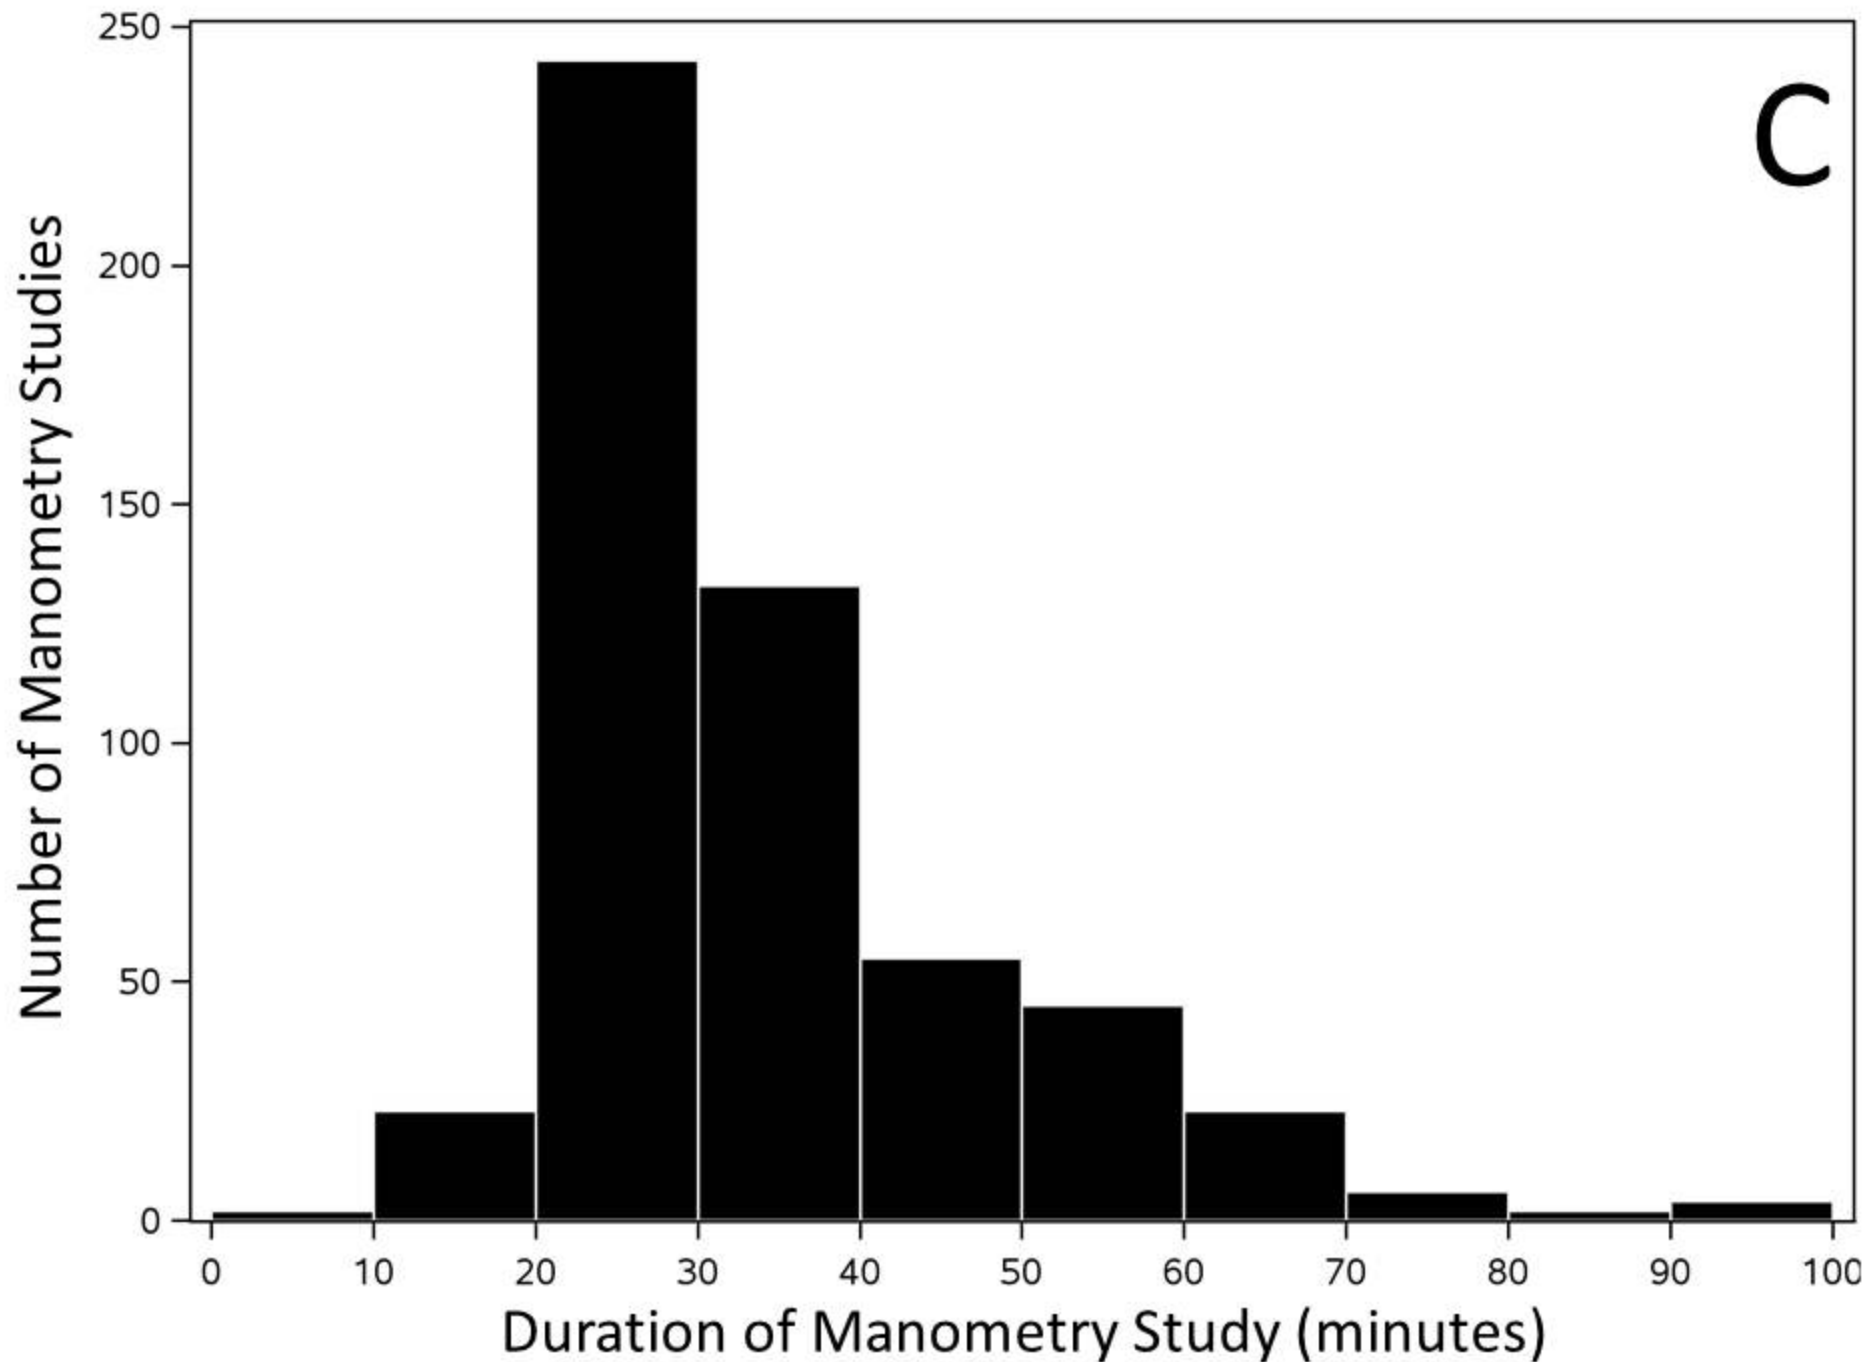

C

Number of Manometry Studies

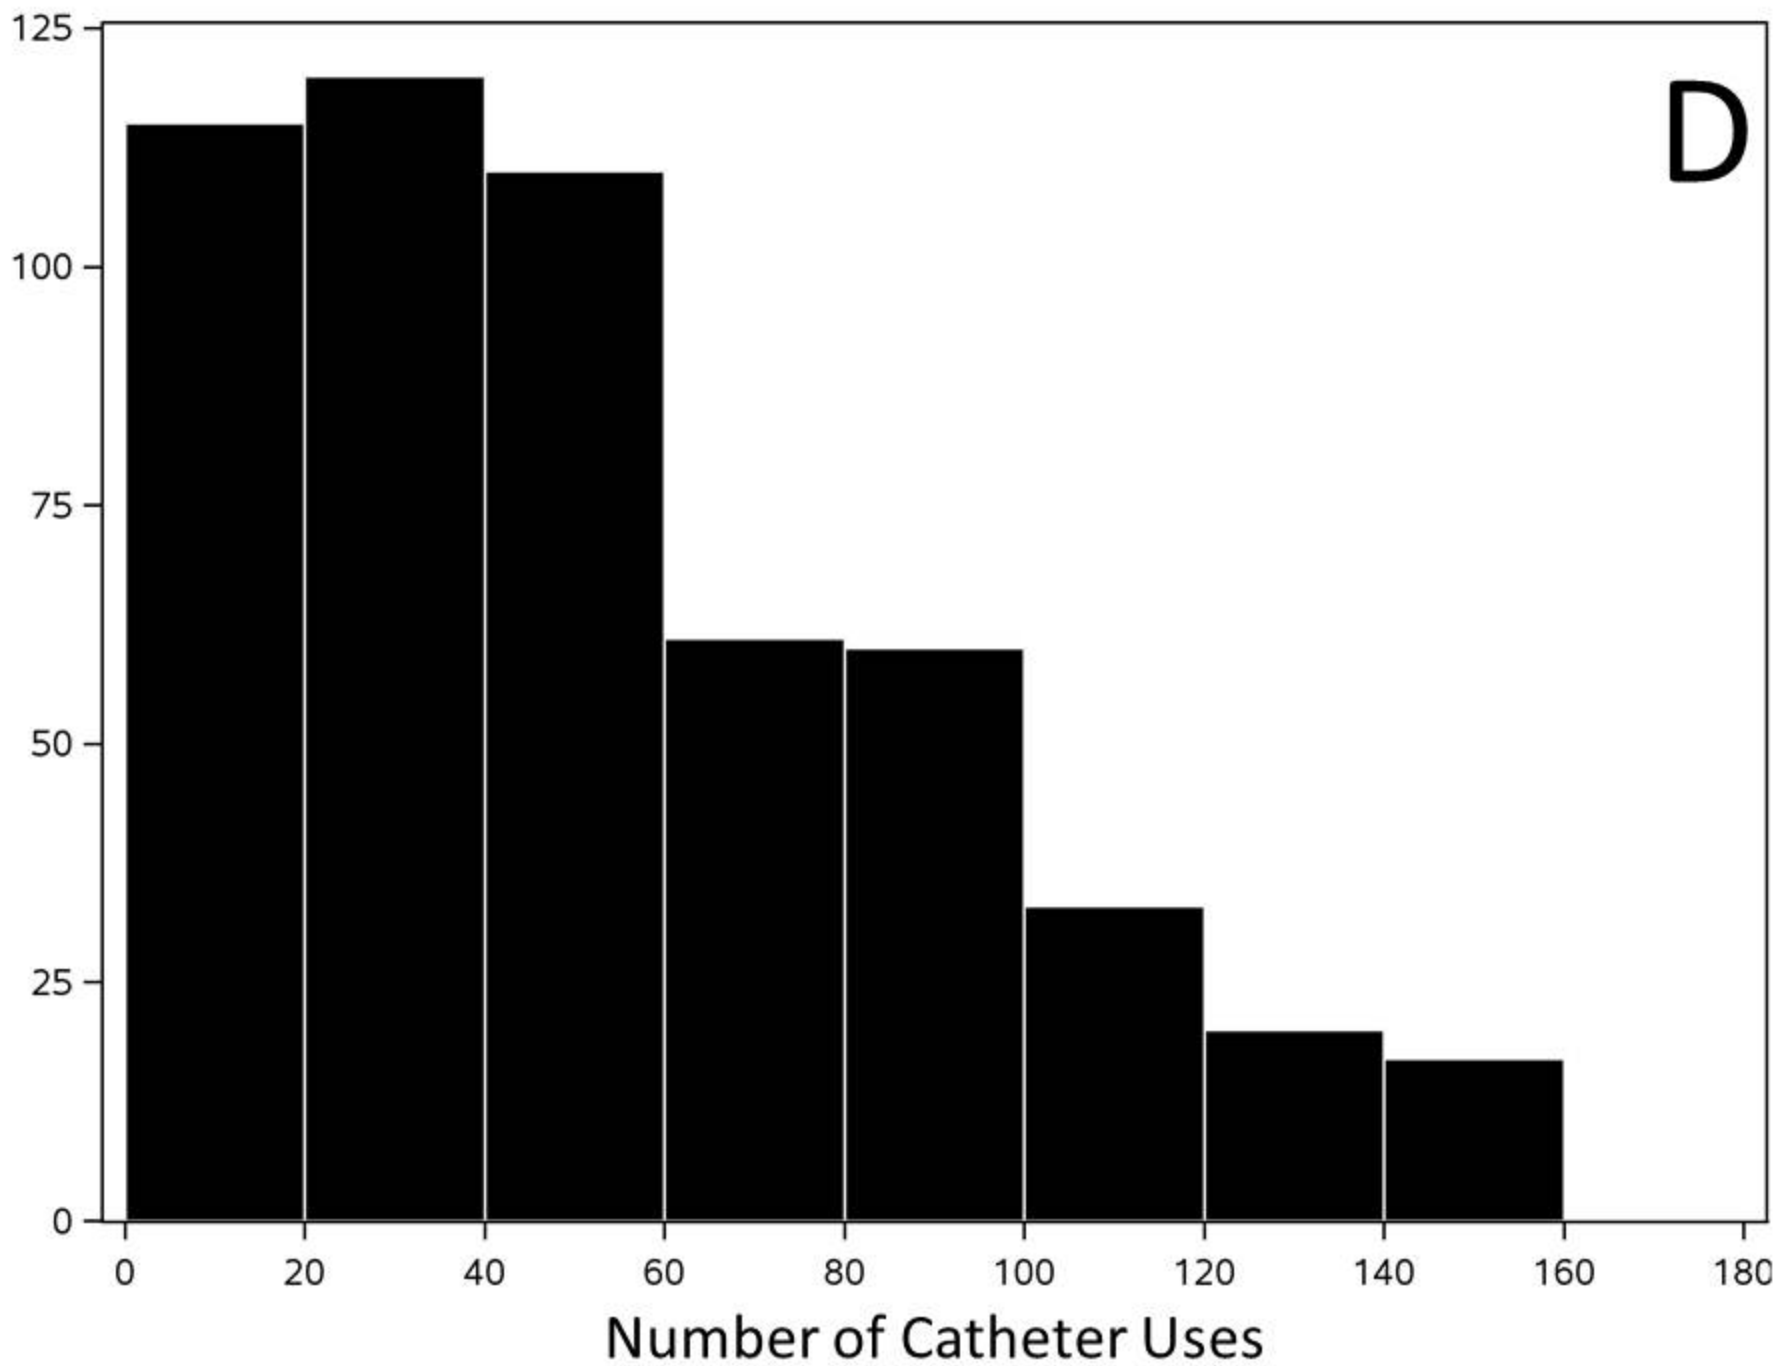

D

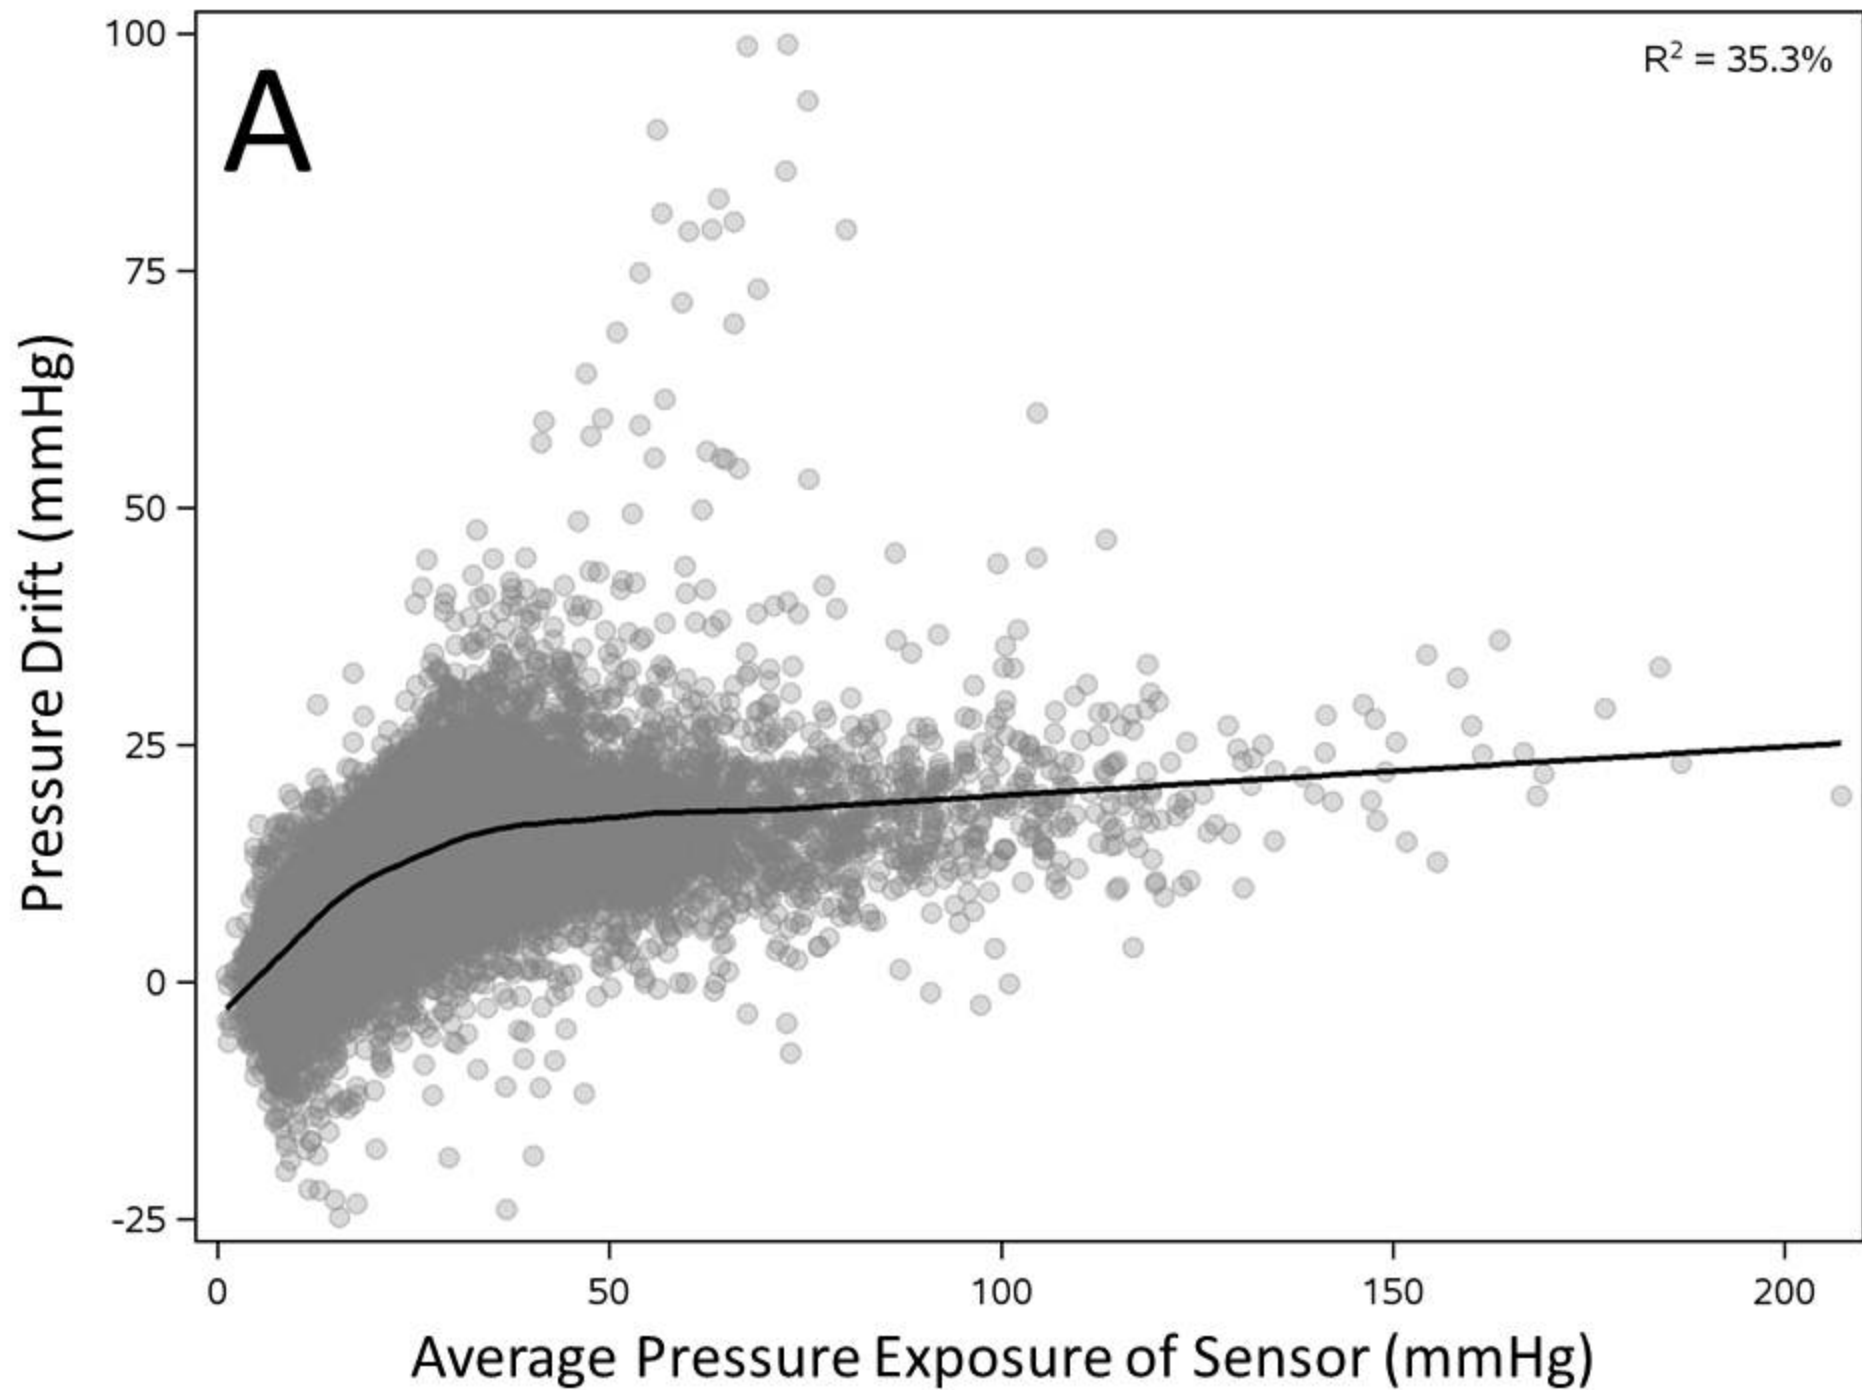

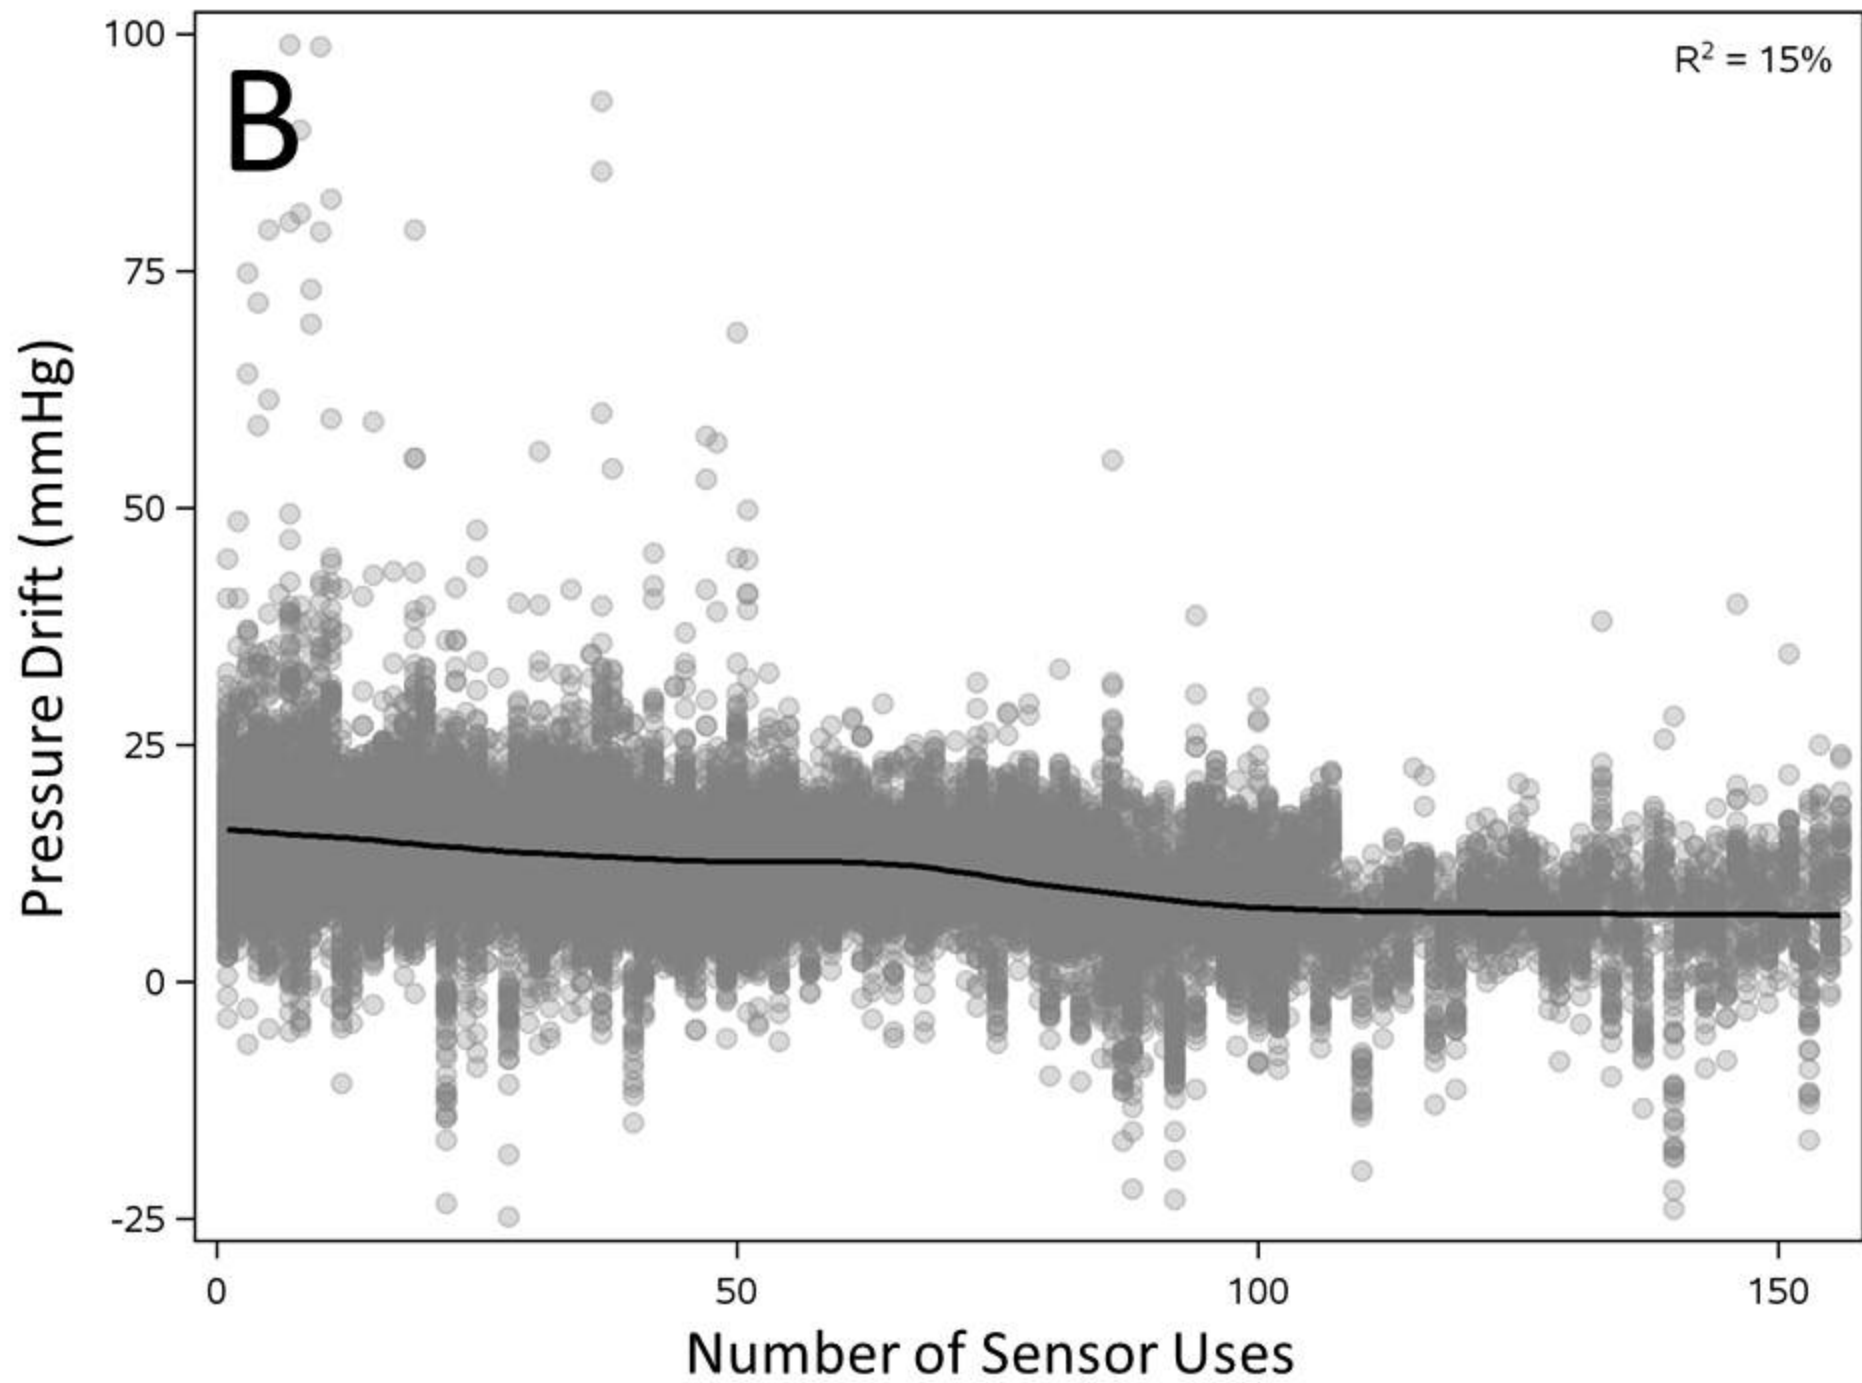

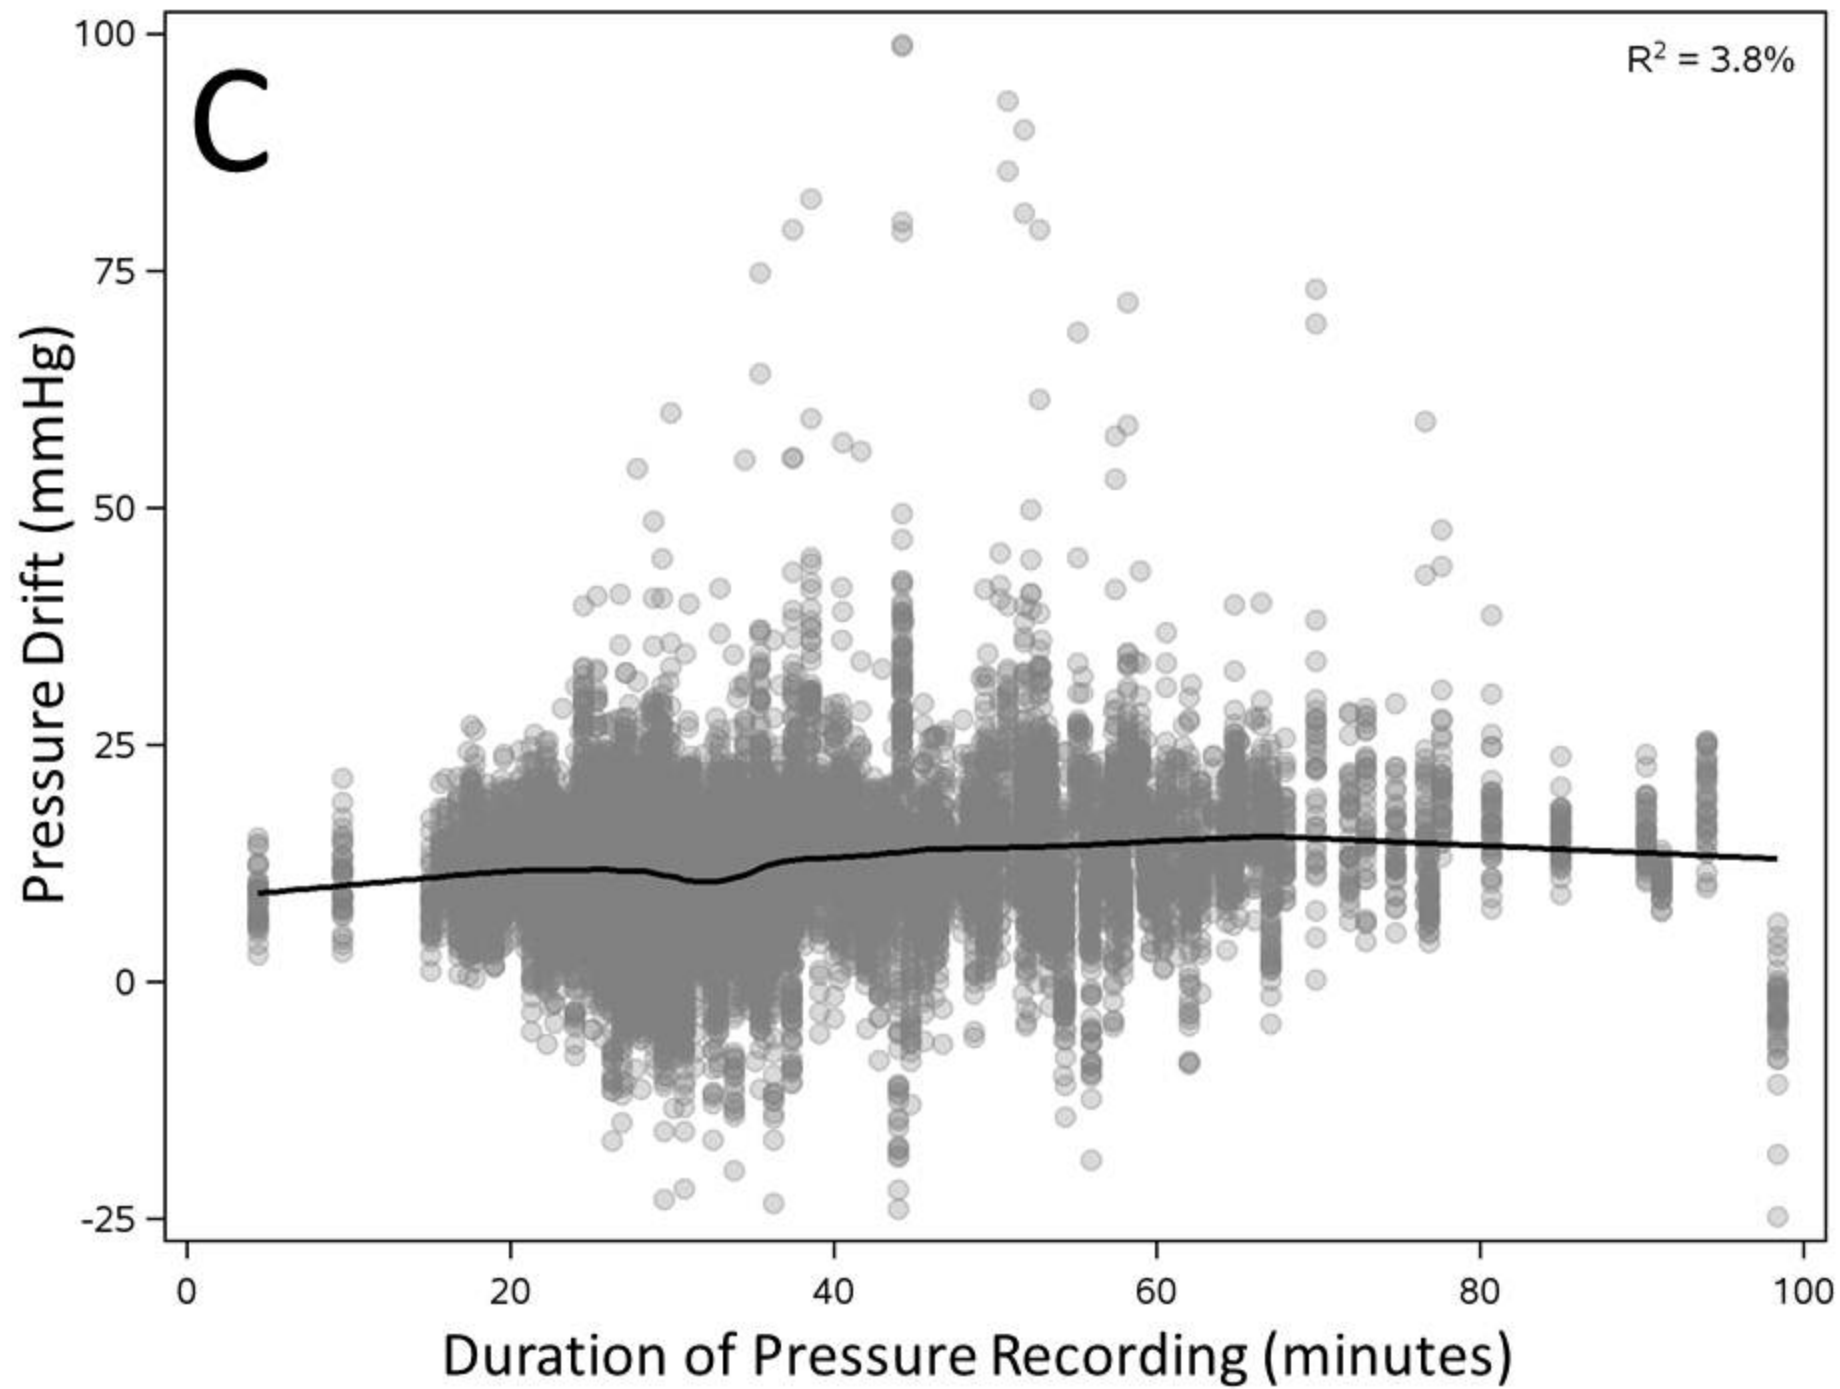

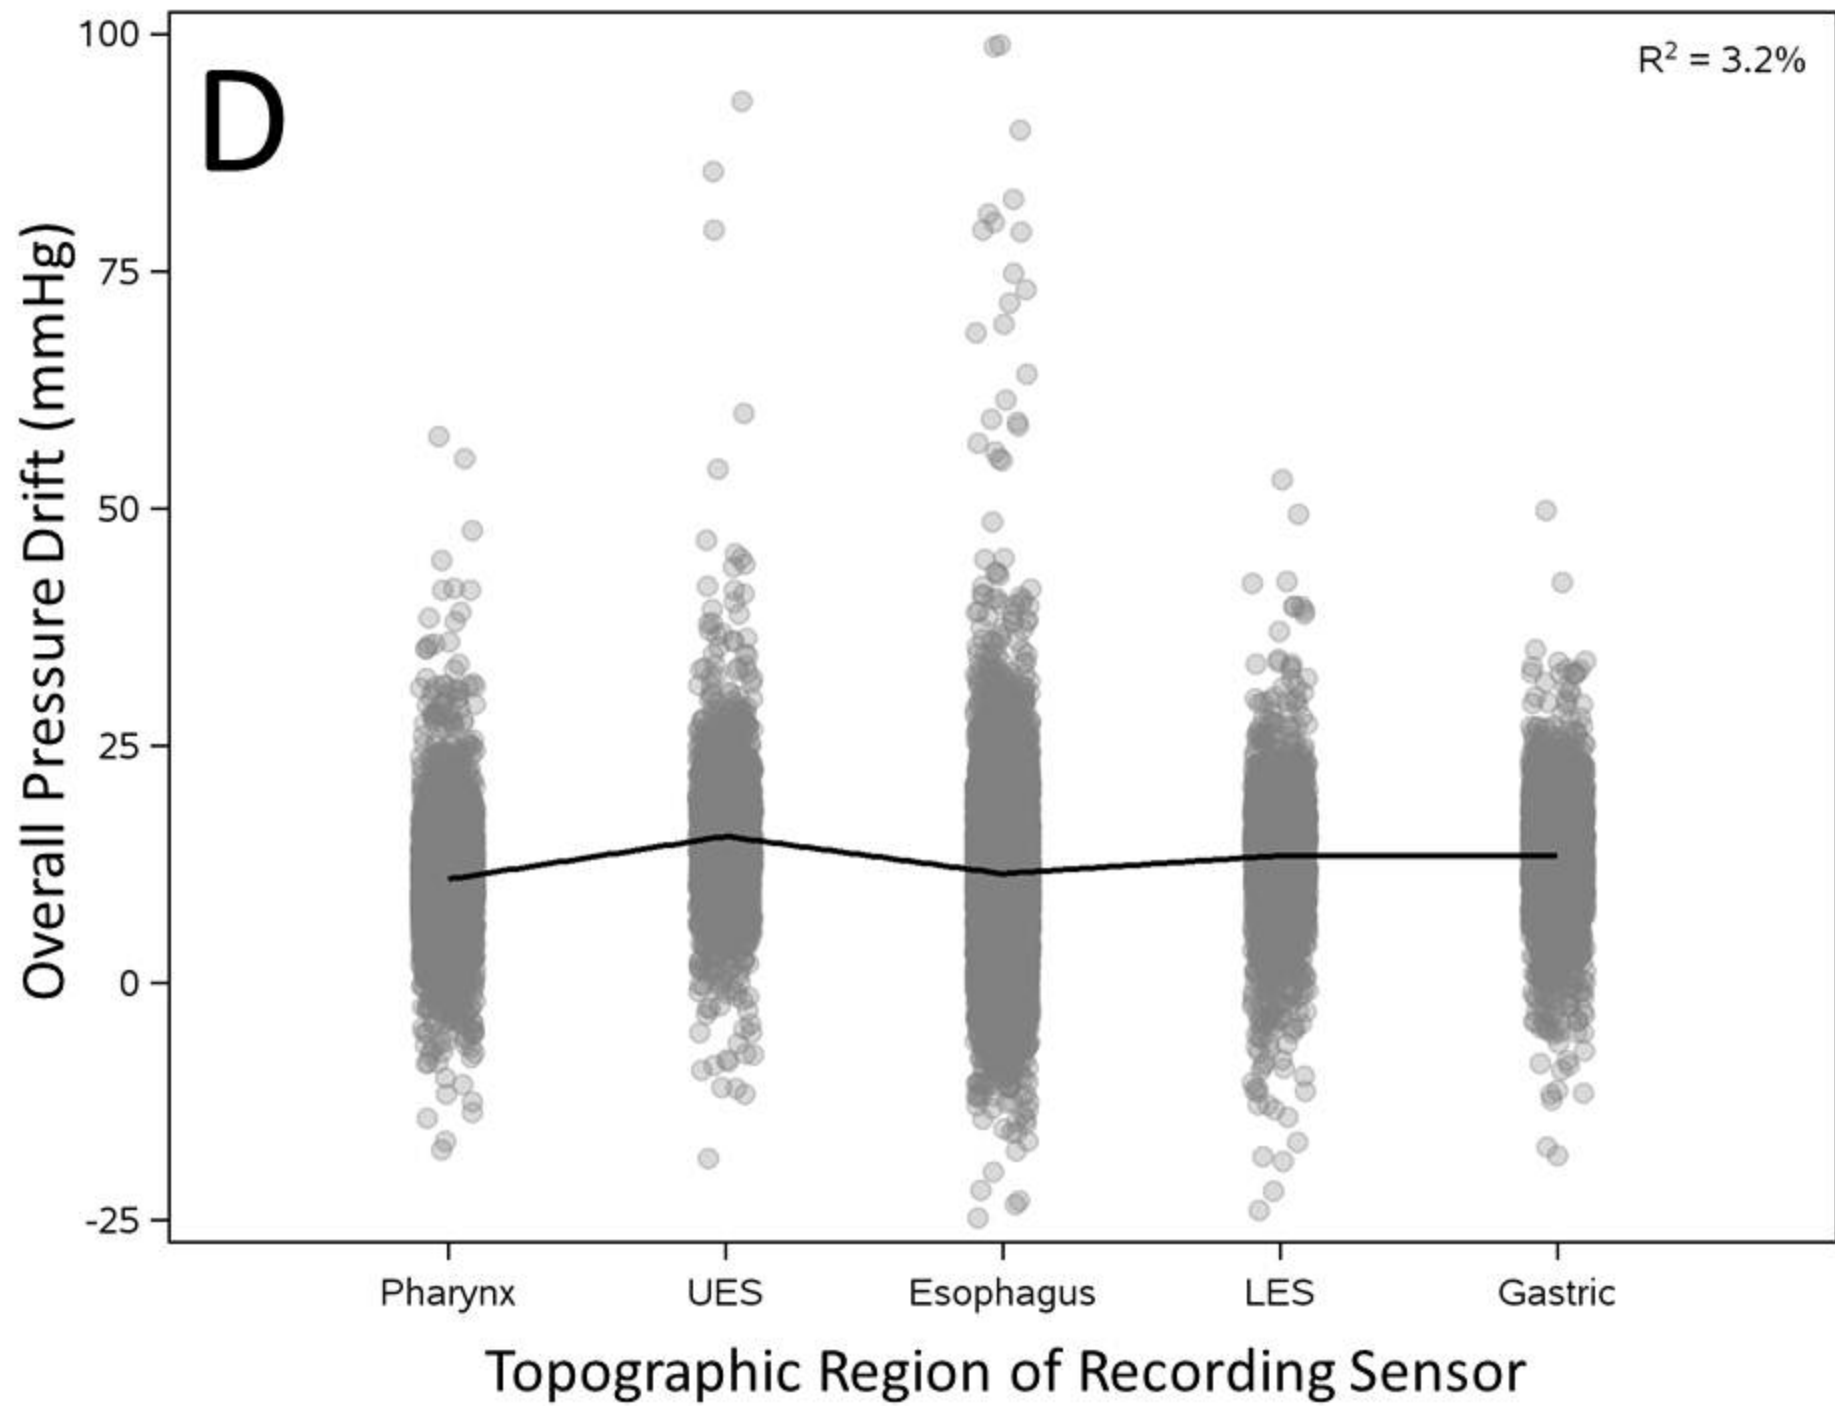



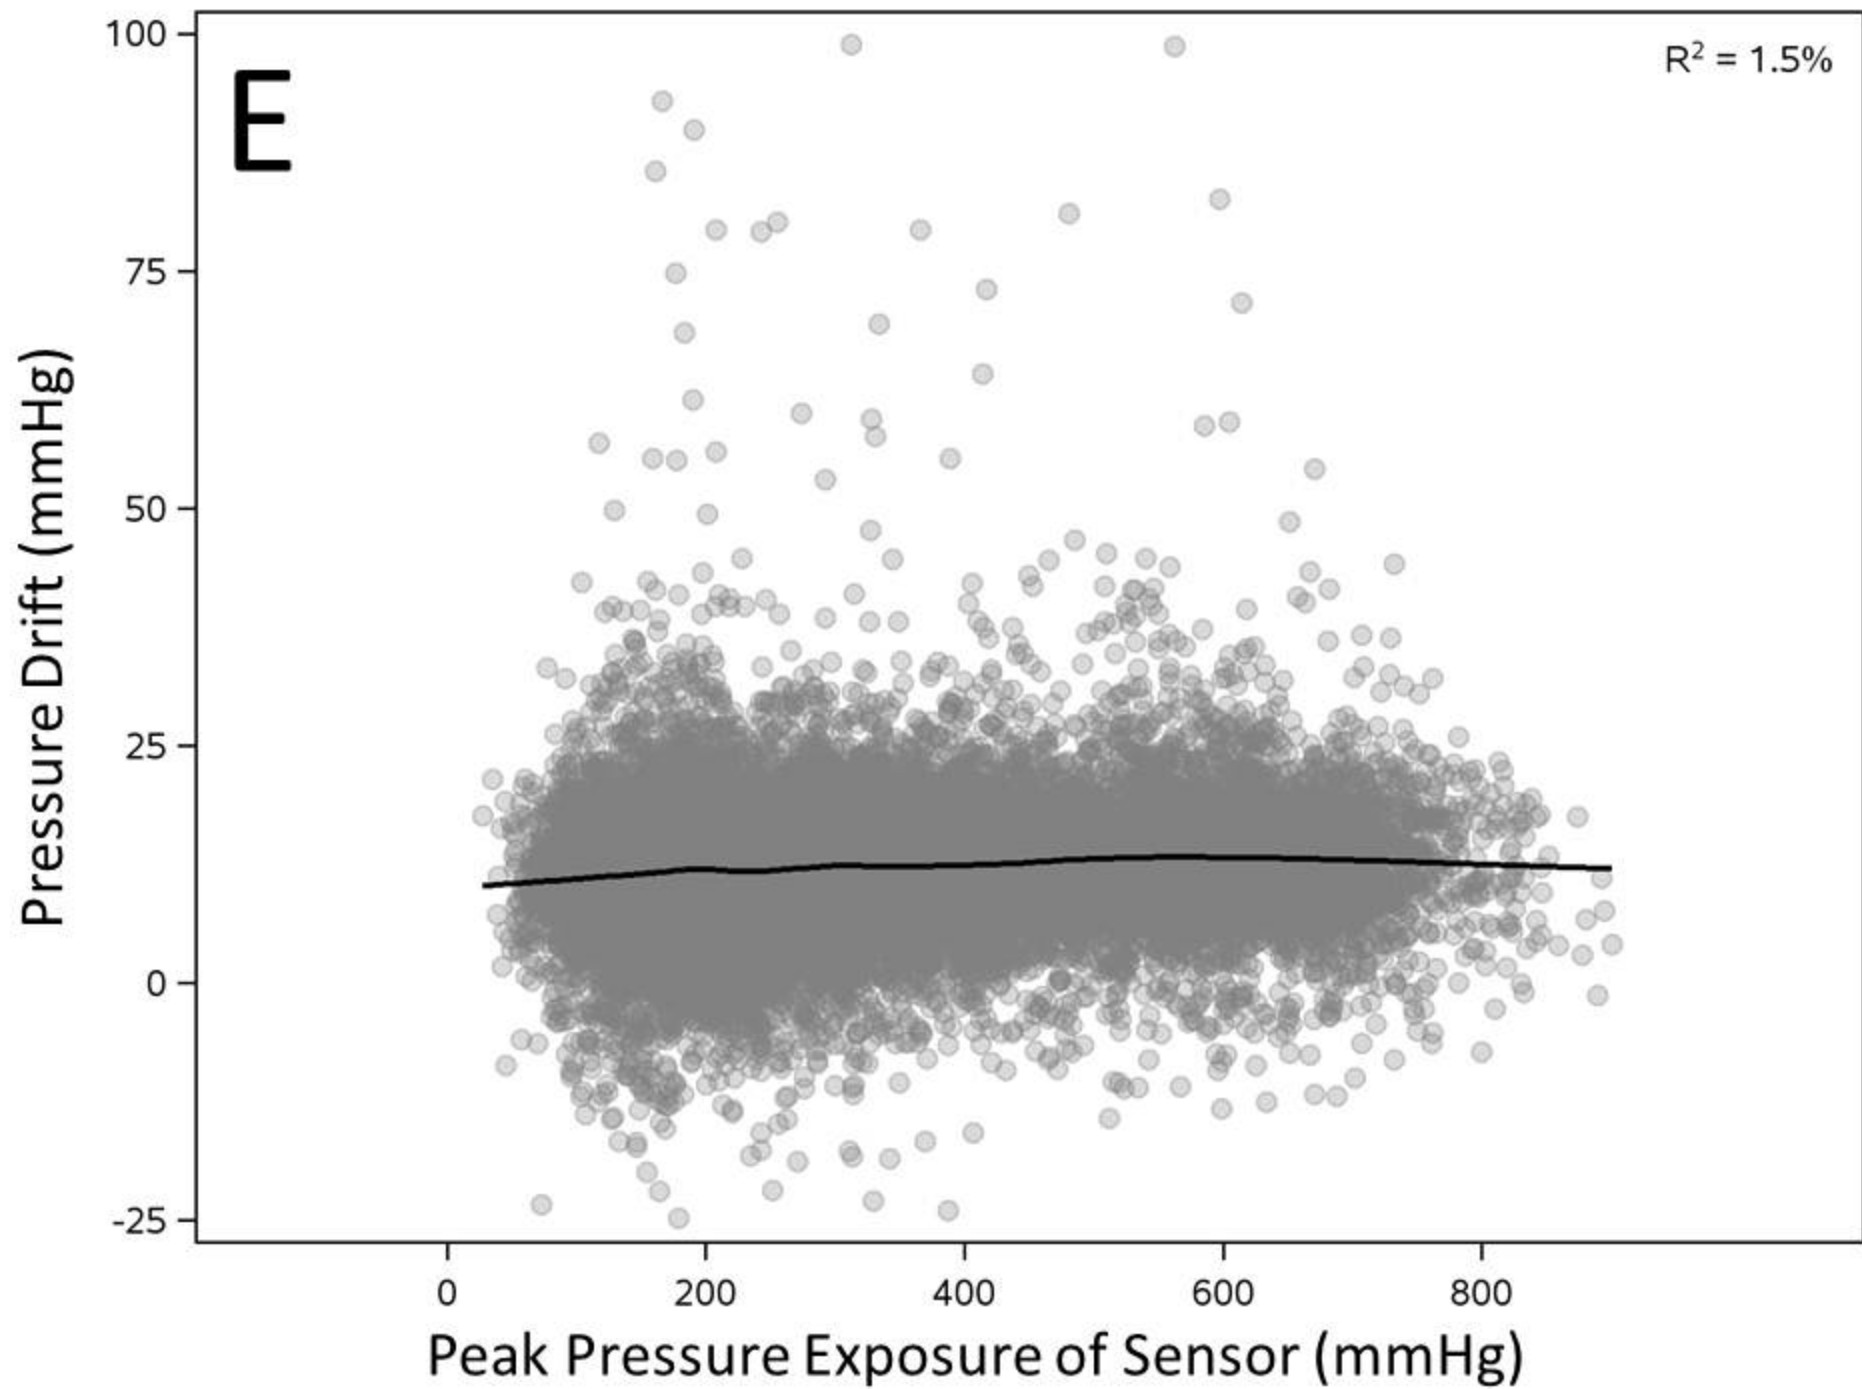

Supplement: NIHMS686327-supplement-Supp_FigureS1-S2.pdf [file NIHMS686327-supplement-Supp_FigureS1-S2.pdf]
